# Supplementary material for: Interactive effects of acacia biochar, maize hybrids, and irrigation levels on soil health and crop productivity
Source: PeerJ. 2025 Sep 24;13:e20048. doi: 10.7717/peerj.20048 (PMC12476171; doi:10.7717/peerj.20048)
Supplement: Supplemental Information 9 [file peerj-13-20048-s009.xlsx]

## Sheet: Soil analysis 
Sr.No	Parameters	saturation%	Available potassium	Available phasphorus	EC(msc)	pH of soil	Organic matter
1	0 T	40	100	4.7	0.63	6.1	0.23
2	0 T	42	100	5.9	0.61	6.3	0.22
3	0 T	43	99	4	0.62	6.7	0.24
4	5T	40	125	5.8	0.74	7	0.48
5	5T	44	121	6.8	0.72	7	0.49
6	5T	44	122	5.9	0.73	7.2	0.45
7	10T	44	106	8	0.8	7.4	0.85
8	10T	46	104	9.8	0.81	7.1	0.86
9	10T	47	106	9.8	0.82	7.6	0.87

## Sheet: Shoot fresh+dry 
Treatment	Shoot fresh weight vegetative	Shoot dry weight	Shoot fresh weight Tasseling	Shoot dry weight	Shoot fresh weight Maturity	Shoot dry weight
2088,100% Etc, 0 tones/ha	291.62	12.565	452.2	174.2	833.2	333.28
2088,100% Etc, 0 tones/ha	293.195	13.23	453.3	173.3	837.7	335.08
2088,100% Etc, 0 tones/ha	292.81	12.915	452.2	158.8	836.6	334.64
2088,70% Etc, 0 tones/ha	205.725	7.025	436.3	156.5	822.9	288.015
2088,70% Etc, 0 tones/ha	206.65	6.6	434.3	155.5	826.6	289.31
2088,70% Etc, 0 tones/ha	206.375	6.95	435.5	133.9	825.5	288.925
2088,50% Etc, 0 tones/ha	148.561	4.332	422.6	136.6	781.9	234.57
2088,50% Etc, 0 tones/ha	148.713	4.503	424.7	132.3	782.7	234.81
2088,50% Etc, 0 tones/ha	148.884	4.693	425.9	194.4	783.6	235.08
2088,100% Etc, 5 tones/ha	301.21	19.985	468.9	196.6	860.6	344.24
2088,100% Etc, 5 tones/ha	302.015	20.02	466.7	193.6	862.9	345.16
2088,100% Etc, 5 tones/ha	302.295	19.705	464.9	165.5	863.7	345.48
2088,70% Etc, 5 tones/ha	213.725	12.7	453.8	167.3	854.9	299.215
2088,70% Etc, 5 tones/ha	212.95	12.65	452.7	168.1	851.8	298.13
2088,70% Etc, 5 tones/ha	213.225	12.45	453.6	141.3	852.9	298.515
2088,50% Etc, 5 tones/ha	164.38	4.96	435.7	142.2	821.9	246.57
2088,50% Etc, 5 tones/ha	165.34	4.74	434.8	145.5	826.7	248.01
2088,50% Etc, 5 tones/ha	165.92	0.229	437.9	297.2	829.6	248.88
2088,100% Etc, 10 tones/ha	312.305	23.555	467.8	296.2	892.3	356.92
2088,100% Etc, 10 tones/ha	313.04	23.625	466.7	294.1	894.4	357.76
2088,100% Etc, 10 tones/ha	312.025	23.73	466.9	274.5	891.5	356.6
2088,70% Etc, 10 tones/ha	220.625	14.7	453.8	275.9	882.5	308.875
2088,70% Etc, 10 tones/ha	220.35	14.4	455.8	276.8	881.4	308.49
2088,70% Etc, 10 tones/ha	220.875	14.975	456.9	230.8	883.5	309.225
2088,50% Etc, 10 tones/ha	172.5	6.22	427.8	232.7	862.5	258.75
2088,50% Etc, 10 tones/ha	172.32	6.08	427.7	233.9	861.6	258.48
2088,50% Etc, 10 tones/ha	172.9	6.46	428.8	177.6	864.5	259.35
YH5427,100% Etc, 0 tones/ha	293.965	15.365	451.5	179.8	839.9	335.96
YH5427,100% Etc, 0 tones/ha	294.035	14.98	452.5	178.5	840.1	336.04
YH5427,100% Etc, 0 tones/ha	293.195	15.365	453.2	121.8	837.7	335.08
YH5427,70% Etc, 0 tones/ha	205.175	12.985	426.7	123.9	820.7	287.245
YH5427,70% Etc, 0 tones/ha	204.925	9.425	427.7	127.7	819.7	286.895
YH5427,70% Etc, 0 tones/ha	204.725	9.3	426.6	111.1	818.9	286.615
YH5427,50% Etc, 0 tones/ha	161.98	5.1	419.2	114.6	809.9	242.97
YH5427,50% Etc, 0 tones/ha	161.54	4.9	415.5	116.6	807.7	242.31
YH5427,50% Etc, 0 tones/ha	161.32	5.1	414.6	188.8	806.6	241.98
YH5427,100% Etc, 5 tones/ha	304.57	19.81	476.6	186.9	870.2	348.08
YH5427,100% Etc, 5 tones/ha	304.465	20.16	474.8	185.7	869.9	347.96
YH5427,100% Etc, 5 tones/ha	304.08	20.58	476.7	156.6	868.8	347.52
YH5427,80% Etc, 5 tones/ha	214.975	12.625	461.7	154.9	859.9	300.965
YH5427,80% Etc, 5 tones/ha	214.45	12.725	462.8	153.7	857.8	300.23
YH5427,80% Etc, 5 tones/ha	214.225	12.875	466.6	130.5	856.9	299.915
YH5427,50% Etc, 5 tones/ha	188.44	6.78	441.8	131.6	792.2	237.66
YH5427,50% Etc, 5 tones/ha	188.28	6.56	442.8	132.9	791.4	237.42
YH5427,50% Etc, 5 tones/ha	188.98	6.88	443.8	286.7	794.9	238.47
YH5427,100% Etc, 10 tones/ha	314.965	25.025	494.3	285.6	899.9	359.96
YH5427,100% Etc, 10 tones/ha	314.58	25.375	493.2	281.8	898.8	359.52
YH5427,100% Etc, 10 tones/ha	314.195	24.675	496.5	271.6	897.7	359.08
YH5427,70% Etc, 10 tones/ha	218.225	16.8	488.8	273.9	872.9	305.515
YH5427,70% Etc, 10 tones/ha	217.95	17.05	487.9	278.6	871.8	305.13
YH5427,70% Etc, 10 tones/ha	219.225	16.525	488.9	201.1	876.9	306.915
YH5427,50% Etc, 10 tones/ha	172.1	12.16	448.4	204.7	860.5	258.15
YH5427,50% Etc, 10 tones/ha	172.76	12.18	447.6	206.7	863.8	259.14
YH5427,50% Etc, 10 tones/ha	172.98	12.14	448.9	169.9	864.9	259.47
6317,100% Etc, 0 tones/ha	294.07	15.82	466.9	168.8	840.2	336.08
6317,100% Etc, 0 tones/ha	295.19	15.505	466.8	167.7	843.4	337.36
6317,100% Etc, 0 tones/ha	295.715	16.205	465.7	155.9	844.9	337.96
6317,70% Etc, 0 tones/ha	205.525	9.375	474.8	158.9	822.1	287.735
6317,70% Etc, 0 tones/ha	205.225	9.125	475.5	156.9	820.9	287.315
6317,70% Etc, 0 tones/ha	205.95	9.1	476.6	135.9	823.8	288.33
6317,60% Etc, 0 tones/ha	160.38	4.84	461.8	136.8	801.9	240.57
6317,60% Etc, 0 tones/ha	160.98	5.08	462.4	133.6	804.9	241.47
6317,60% Etc, 0 tones/ha	161.16	4.92	463.5	220.9	805.8	241.74
6317,100% Etc, 5 tones/ha	306.46	23.03	476.6	222.8	875.6	350.24
6317,100% Etc, 5 tones/ha	306.915	22.61	475.5	223.7	876.9	350.76
6317,100% Etc, 5 tones/ha	307.475	23.38	476.6	209.9	878.5	351.4
6317,70% Etc, 5 tones/ha	217.2	14.7	461.7	208.6	868.8	304.08
6317,70% Etc, 5 tones/ha	216.65	14.4	462.8	205.5	866.6	303.31
6317,70% Etc, 5 tones/ha	216.475	14.85	461.2	176.9	865.9	303.065
6317,50% Etc, 5 tones/ha	171.88	7.48	440.1	178.9	859.4	257.82
6317,50% Etc, 5 tones/ha	171.12	6.9	441.8	177.9	855.6	256.68
6317,50% Etc, 5 tones/ha	172.94	7.5	441.9	300.9	864.7	259.41
6317,100% Etc, 10 tones/ha	322.315	26.32	494.3	298.7	920.9	368.36
6317,100% Etc, 10 tones/ha	321.615	26.88	495.5	299.9	918.9	367.56
6317,100% Etc, 10 tones/ha	321.23	27.37	493.6	288.8	917.8	367.12
6317,70% Etc, 10 tones/ha	227.225	16.625	488.1	286.6	908.9	318.115
6317,70% Etc, 10 tones/ha	226.65	16.15	486.6	285.5	906.6	317.31
6317,70% Etc, 10 tones/ha	226.375	16.95	488.9	191.2	905.5	316.925
6317,50% Etc, 10 tones/ha	177.46	8.02	477.1	193.8	887.3	266.19
6317,50% Etc, 10 tones/ha	176.88	8.42	475.6	192.7	884.4	265.32
		8.36	476.6		886.6	265.98

## Sheet: Root fresh+dry 
Treatment	RFW	Root fresh weight	Root fresh weight at Tasseling	Root dry weight at Tasseling	Root fresh weight at maturity	Root Dry weight at maturity	Root dry weight
2088,100% Etc, 0 tones/ha	5.25	16.4	44.16	12.565	64.4	18.032	18.032		12.565		Leaf dry weight
2088,100% Etc, 0 tones/ha	6.25	10.4	43.16	13.23	62.4	17.472	17.472		13.23		74.84
2088,100% Etc, 0 tones/ha	7.95	7	44.17	12.915	65.4	18.312	18.312		12.915		74.68
2088,70% Etc, 0 tones/ha	6.85	19.7	28.1	7.025	44.4	11.1	11.1		7.025		75.16
2088,70% Etc, 0 tones/ha	5.79	14.5	26.4	6.6	42.8	10.7	10.7		6.6		43.375
2088,70% Etc, 0 tones/ha	7.75	11.6	25.8	6.95	41.9	10.475	10.475		6.95		43.125
2088,50% Etc, 0 tones/ha	5.05	27	20.8	4.332	34.4	6.88	6.88		4.332		43.475
2088,50% Etc, 0 tones/ha	4.02	22.6	20.7	4.503	33.3	6.66	6.66		4.503		30.76
2088,50% Etc, 0 tones/ha	5.01	15.5	21.7	4.693	32.5	6.5	6.5		4.693		30.38
2088,100% Etc, 5 tones/ha	7.71	16.8	57.1	19.985	85.5	23.94	23.94		19.985		30.38
2088,100% Etc, 5 tones/ha	5.85	12.9	57.2	20.02	86.7	24.276	24.276		20.02		79.96
2088,100% Etc, 5 tones/ha	7.55	9.8	56.3	19.705	87.8	24.584	24.584		19.705		79.12
2088,70% Etc, 5 tones/ha	7.25	26.8	50.8	12.7	77.5	19.375	19.375		12.7		79.56
2088,70% Etc, 5 tones/ha	6.75	19.3	50.6	12.65	77.4	19.35	19.35		12.65		42.975
2088,70% Etc, 5 tones/ha	8.6	15.4	49.8	12.45	77.6	19.4	19.4		12.45		42.7
2088,50% Etc, 5 tones/ha	7.85	35.4	24.8	4.96	43.3	8.66	8.66		4.96		43.225
2088,50% Etc, 5 tones/ha	9.5	26.8	23.7	4.74	43.4	8.68	8.68		4.74		33.54
2088,50% Etc, 5 tones/ha	6.5	19	22.9	0.229	43.4	8.68	8.68		0.229		33.38
2088,100% Etc, 10 tones/ha	16.3	18.4	67.3	23.555	107.9	30.212	30.212		23.555		33.92
2088,100% Etc, 10 tones/ha	19.35	12.9	67.5	23.625	106.1	29.708	29.708		23.625		88.32
2088,100% Etc, 10 tones/ha	18.7	10.6	67.8	23.73	107.8	30.184	30.184		23.73		89.08
2088,70% Etc, 10 tones/ha	10.65	40.3	58.8	14.7	81.8	20.45	20.45		14.7		89.96
2088,70% Etc, 10 tones/ha	11.65	28.3	57.6	14.4	82.9	20.725	20.725		14.4		54.675
2088,70% Etc, 10 tones/ha	13.69	21.9	59.9	14.975	82.2	20.55	20.55		14.975		54.475
2088,50% Etc, 10 tones/ha	10.1	46	31.1	6.22	48.4	9.68	9.68		6.22		54.225
2088,50% Etc, 10 tones/ha	11.75	31.5	30.4	6.08	48.5	9.7	9.7		6.08		41.38
2088,50% Etc, 10 tones/ha	9.3	26.7	32.3	6.46	48.7	9.74	9.74		6.46		40.96
YH5427,100% Etc, 0 tones/ha	14.7		43.9	15.365	69.1	19.348	19.348		15.365		40.78
YH5427,100% Etc, 0 tones/ha	15.8		42.8	14.98	69.2	19.376	19.376		14.98		64.36
YH5427,100% Etc, 0 tones/ha	17.9		43.9	15.365	68.2	19.096	19.096		15.365		64.72
YH5427,70% Etc, 0 tones/ha	13.7		37.1	12.985	45.5	11.375	11.375		12.985		66.32
YH5427,70% Etc, 0 tones/ha	12.05		37.7	9.425	44.5	11.125	11.125		9.425		36.475
YH5427,70% Etc, 0 tones/ha	11.2		37.2	9.3	45.6	11.4	11.4		9.3		36.7
YH5427,50% Etc, 0 tones/ha	11.3		25.5	5.1	33.4	6.68	6.68		5.1		36.225
YH5427,50% Etc, 0 tones/ha	10.05		24.5	4.9	32.6	6.52	6.52		4.9		27.98
YH5427,50% Etc, 0 tones/ha	12.35		25.5	5.1	33.6	6.72	6.72		5.1		27.52
YH5427,100% Etc, 5 tones/ha	26.75		56.6	19.81	87.8	24.584	24.584		19.81		27.1
YH5427,100% Etc, 5 tones/ha	27.9		57.6	20.16	86.8	0.28	0.28		20.16		99.96
YH5427,100% Etc, 5 tones/ha	25.75		58.8	20.58	87.9	24.612	24.612		20.58		99.08
YH5427,80% Etc, 5 tones/ha	19.25		50.5	12.625	74.1	18.525	18.525		12.625		99.04
YH5427,80% Etc, 5 tones/ha	20.6		50.9	12.725	74.1	18.525	18.525		12.725		60.95
YH5427,80% Etc, 5 tones/ha	18.15		51.5	12.875	74.2	18.55	18.55		12.875		60.675
YH5427,50% Etc, 5 tones/ha	12.55		33.9	6.78	48.2	9.64	9.64		6.78		60.475
YH5427,50% Etc, 5 tones/ha	17.65		32.8	6.56	47.3	9.46	9.46		6.56		44.16
YH5427,50% Etc, 5 tones/ha	17.1		34.4	6.88	48.8	9.76	9.76		6.88		44.96
YH5427,100% Etc, 10 tones/ha	36.75		71.5	25.025	102.6	28.728	28.728		25.025		44.78
YH5427,100% Etc, 10 tones/ha	34.9		72.5	25.375	103.7	29.036	29.036		25.375		119.96
YH5427,100% Etc, 10 tones/ha	35.75		70.5	24.675	102.9	28.812	28.812		24.675		119.04
YH5427,70% Etc, 10 tones/ha	29.17		67.2	16.8	87.6	21.9	21.9		16.8		118.2
YH5427,70% Etc, 10 tones/ha	26.65		68.2	17.05	85.2	21.3	21.3		17.05		71.125
YH5427,70% Etc, 10 tones/ha	24.6		66.1	16.525	89.2	22.3	22.3		16.525		71.65
YH5427,50% Etc, 10 tones/ha	22.2		60.8	12.16	56.6	11.32	11.32		12.16		71.125
YH5427,50% Etc, 10 tones/ha	19.3		60.9	12.18	55.6	11.12	11.12		12.18		56.18
YH5427,50% Etc, 10 tones/ha	16.65		60.7	12.14	54.5	10.9	10.9		12.14		55.76
6317,100% Etc, 0 tones/ha	19.55		45.2	15.82	67.2	18.816	18.816		15.82		55.36
6317,100% Etc, 0 tones/ha	20.8		44.3	15.505	67.3	18.844	18.844		15.505		59.16
6317,100% Etc, 0 tones/ha	18.1		46.3	16.205	67.1	18.788	18.788		16.205		58.64
6317,70% Etc, 0 tones/ha	12.55		37.5	9.375	44.4	11.1	11.1		9.375		58.36
6317,70% Etc, 0 tones/ha	10.6		36.5	9.125	43.3	10.825	10.825		9.125		34.725
6317,70% Etc, 0 tones/ha	13.5		36.4	9.1	44.4	11.1	11.1		9.1		34.175
6317,60% Etc, 0 tones/ha	6.88		24.2	4.84	33.4	6.68	6.68		4.84		33.875
6317,60% Etc, 0 tones/ha	5.45		25.4	5.08	33.9	6.78	6.78		5.08		26.32
6317,60% Etc, 0 tones/ha	6.52		24.6	4.92	33.4	6.68	6.68		4.92		26.16
6317,100% Etc, 5 tones/ha	27.75		65.8	23.03	92.1	25.788	25.788		23.03		26.56
6317,100% Etc, 5 tones/ha	30.65		64.6	22.61	92.7	25.956	25.956		22.61		123.52
6317,100% Etc, 5 tones/ha	29.6		66.8	23.38	92.2	25.816	25.816		23.38		123.96
6317,70% Etc, 5 tones/ha	25.2		58.8	14.7	82.4	20.6	20.6		14.7		122.64
6317,70% Etc, 5 tones/ha	20.2		57.6	14.4	83.4	20.85	20.85		14.4		75.7
6317,70% Etc, 5 tones/ha	19.7		59.4	14.85	83.4	20.85	20.85		14.85		75.7
6317,50% Etc, 5 tones/ha	14.3		37.4	7.48	47.4	0.2	0.2		7.48		75.425
6317,50% Etc, 5 tones/ha	17.55		34.5	6.9	46.4	9.28	9.28		6.9		59.98
6317,50% Etc, 5 tones/ha	15.5		37.5	7.5	47.4	9.48	9.48		7.5		59.56
6317,100% Etc, 10 tones/ha	46.65		75.2	26.32	106.5	29.82	29.82		26.32		59.38
6317,100% Etc, 10 tones/ha	43.5		76.8	26.88	105.5	29.54	29.54		26.88		138.32
6317,100% Etc, 10 tones/ha	44.35		78.2	27.37	106.5	29.82	29.82		27.37		137.88
6317,70% Etc, 10 tones/ha	42.45		66.5	16.625	92.1	23.025	23.025		16.625		136.76
6317,70% Etc, 10 tones/ha	40.35		64.6	16.15	90.1	22.525	22.525		16.15		84.975
6317,70% Etc, 10 tones/ha	37.8		67.8	16.95	92.2	23.05	23.05		16.95		84.425
6317,50% Etc, 10 tones/ha	27.9		50.1	8.02	57.3	11.46	11.46		8.02		84.15
6317,50% Etc, 10 tones/ha	28.75		52.1	8.42	57.2	11.44	11.44		8.42		65.98
6317,50% Etc, 10 tones/ha	29.51		51.8	8.36	57.8	11.56	11.56		8.36		65.56
											64.98

## Sheet: Yields parameters
Treatment	stover Yields	Grain fresh weight	Grain dry weight	Cob length	Hundred seed weight	Yield kg
2088,100% Etc, 0 tones/ha	241.225	50.6	29.25	19.51	33.25	9668.75
2088,100% Etc, 0 tones/ha	228.925	51.75	29.05	19.44	30.05	9441.25
2088,100% Etc, 0 tones/ha	232.625	52.55	29.25	19.29	28.45	9830.62
2088,70% Etc, 0 tones/ha	202.025	46.16	15.5	18.86	24.15	7857.5
2088,70% Etc, 0 tones/ha	194.375	44.16	14.15	18.95	25.5	7420
2088,70% Etc, 0 tones/ha	188.425	45.75	13.1	18.9	23.16	7166.25
2088,50% Etc, 0 tones/ha	121.75	16.35	5.6	17.51	18.6	6146.88
2088,50% Etc, 0 tones/ha	118.875	15.33	6.6	17.28	16.4	5810
2088,50% Etc, 0 tones/ha	110.65	17.17	6.5	17.18	19.01	6068.12
2088,100% Etc, 5 tones/ha	271.725	75.6	35.01	21.23	36.2	10443.1
2088,100% Etc, 5 tones/ha	274.375	74.75	34.09	21.16	37.68	10093.1
2088,100% Etc, 5 tones/ha	263.15	73.45	33.45	21	39.55	9922.5
2088,70% Etc, 5 tones/ha	214	56.05	27.2	20.52	29.65	8443.75
2088,70% Etc, 5 tones/ha	208	55.05	25.6	20.62	27.75	8034.25
2088,70% Etc, 5 tones/ha	200.75	54.03	24.2	20.55	26.25	7818.12
2088,50% Etc, 5 tones/ha	154.625	37.9	14.15	20.09	22.29	7135.62
2088,50% Etc, 5 tones/ha	147.325	35.35	12.95	19.86	21.25	6584.38
2088,50% Etc, 5 tones/ha	154.15	34.35	13.05	19.75	24.35	6237.88
2088,100% Etc, 10 tones/ha	306.75	119.7	49.85	24.17	53.2	11300.6
2088,100% Etc, 10 tones/ha	318.525	118.15	48.95	24.1	51.45	10998.8
2088,100% Etc, 10 tones/ha	316.475	117.95	47.3	25.93	50.25	10823.8
2088,70% Etc, 10 tones/ha	275.9	69.25	36.7	22.4	39.35	9582.12
2088,70% Etc, 10 tones/ha	266.5	67.75	34.15	22.51	36.35	9235.62
2088,70% Etc, 10 tones/ha	263.75	66.15	35.3	22.42	35.45	8976.62
2088,50% Etc, 10 tones/ha	182.875	77.1	29.95	21.89	29.85	7818.12
2088,50% Etc, 10 tones/ha	179	78.11	28.01	21.66	26.25	7109.38
2088,50% Etc, 10 tones/ha	170.75	76.12	27.17	21.54	25.83	7462.88
YH5427,100% Etc, 0 tones/ha	241.75	81.9	32.7	17.63	32.14	9458.75
YH5427,100% Etc, 0 tones/ha	240.1	82.25	34.05	17.56	31.25	9156.88
YH5427,100% Etc, 0 tones/ha	219.65	83.05	33.09	17.42	34.28	8920.62
YH5427,70% Etc, 0 tones/ha	202.625	68.9	17.05	17.04	26.6	7651.88
YH5427,70% Etc, 0 tones/ha	198.325	67.95	18.85	17.12	24.7	7091.88
YH5427,70% Etc, 0 tones/ha	187.125	69.1	15.8	17.09	28.4	7065.62
YH5427,50% Etc, 0 tones/ha	137.875	44.65	10.1	15.77	14.4	6098.75
YH5427,50% Etc, 0 tones/ha	126.875	43.16	11.3	15.54	16.25	5565
YH5427,50% Etc, 0 tones/ha	128.225	42.1	12.09	15.45	19.65	5476.63
YH5427,100% Etc, 5 tones/ha	310.15	131.01	79.3	19.41	39.25	10504.4
YH5427,100% Etc, 5 tones/ha	295.375	132.55	78.2	19.34	43.28	10499.1
YH5427,100% Etc, 5 tones/ha	296.875	133.05	76.15	19.19	40.85	10066.9
YH5427,80% Etc, 5 tones/ha	246.925	117.25	49.1	18.76	29.27	8880.38
YH5427,80% Etc, 5 tones/ha	234.375	118.4	49.5	18.85	27.24	8582.88
YH5427,80% Etc, 5 tones/ha	231.2	119.7	47.1	18.8	25.35	8369.38
YH5427,50% Etc, 5 tones/ha	157.9	63.25	23.45	18.41	20.25	6895
YH5427,50% Etc, 5 tones/ha	150.725	66.7	22.85	18.18	23.65	6273.75
YH5427,50% Etc, 5 tones/ha	152.65	64.5	21.85	18.08	22.75	6174
YH5427,100% Etc, 10 tones/ha	313.25	146.85	84.45	21.24	50.35	11703.1
YH5427,100% Etc, 10 tones/ha	318.3	145.4	83.35	21.17	52.33	11366.3
YH5427,100% Etc, 10 tones/ha	318.325	144.3	85.45	21.01	49.32	11453.8
YH5427,70% Etc, 10 tones/ha	252.375	94.5	54.55	20.53	42.35	9494.62
YH5427,70% Etc, 10 tones/ha	265.1	96.4	53.15	20.63	40.35	9723
YH5427,70% Etc, 10 tones/ha	230.075	95.7	50.21	20.56	38.35	8815.62
YH5427,50% Etc, 10 tones/ha	184.175	79.45	29.5	20.1	29.85	6983.38
YH5427,50% Etc, 10 tones/ha	165.625	78.25	28.2	19.87	27.25	6282.5
YH5427,50% Etc, 10 tones/ha	169	77.85	27.5	19.76	26.83	6174.87
6317,100% Etc, 0 tones/ha	209.225	94.45	32.55	16.18	34.2	8859.38
6317,100% Etc, 0 tones/ha	212.275	99.45	30.05	16.11	35.05	9097.38
6317,100% Etc, 0 tones/ha	204.025	96.01	29.35	15.96	37.1	9209.38
6317,70% Etc, 0 tones/ha	201.775	71.01	29.25	15.53	27.95	7761.25
6317,70% Etc, 0 tones/ha	196.4	70.11	27.15	15.62	25.92	7122.5
6317,70% Etc, 0 tones/ha	194.65	72.01	28.05	15.57	24.91	7533.75
6317,60% Etc, 0 tones/ha	0.325	29.8	12.95	11.18	19.29	6041.88
6317,60% Etc, 0 tones/ha	0.321	28.55	14.01	12.95	17.22	5718.12
6317,60% Etc, 0 tones/ha	0.32	27.01	13.01	11.85	16.28	5359.38
6317,100% Etc, 5 tones/ha	231.375	153.55	56.6	17.9	49.4	11405.6
6317,100% Etc, 5 tones/ha	235.125	152.05	55.75	17.83	46.3	11620
6317,100% Etc, 5 tones/ha	207.9	151.01	54.55	17.67	47.21	11873.7
6317,70% Etc, 5 tones/ha	243.5	128.17	44.75	17.19	39.92	7761.25
6317,70% Etc, 5 tones/ha	241.875	129.14	46.72	17.29	37.85	7122.5
6317,70% Etc, 5 tones/ha	231.925	130.25	43.35	17.22	40.92	7533.75
6317,50% Etc, 5 tones/ha	187.875	112.14	22.55	16.76	22.99	6164.38
6317,50% Etc, 5 tones/ha	176.575	116.14	23.75	16.53	23.94	6495.12
6317,50% Etc, 5 tones/ha	169.275	113.11	21.6	16.42	21.98	6216.88
6317,100% Etc, 10 tones/ha	329.125	199.7	89.19	19.84	50.55	12088.1
6317,100% Etc, 10 tones/ha	332.775	197.6	87.95	19.77	52.53	11904.4
6317,100% Etc, 10 tones/ha	328.875	198.4	86.7	19.6	49.52	12163.4
6317,70% Etc, 10 tones/ha	274	172.9	49.35	19.07	41.85	10255
6317,70% Etc, 10 tones/ha	278.125	173.4	48.25	19.18	44.92	9721.25
6317,70% Etc, 10 tones/ha	270.875	174.4	46.25	19.09	42.92	10080
6317,50% Etc, 10 tones/ha	192.875	126.25	24.25	18.56	24.33	7835.62
6317,50% Etc, 10 tones/ha	199	124.6	25.15	18.33	26.35	7170.63
6317,50% Etc, 10 tones/ha	204.375	121.65	26.75	18.21	25.54	7503.13
								8859.38	0 t/ha 100% V3
								9097.38	0 t/ha 100% V3
								9209.38	0 t/ha 100% V3
								8505	0 t/ha 80% V3
								8102.5	0 t/ha 80% V3
								7958.12	0 t/ha 80% V3
								7761.25	0 t/ha 70% V3
								7122.5	0 t/ha 70% V3
								7533.75	0 t/ha 70% V3
								6676.25	0 t/ha 60% V3
								6230	0 t/ha 60% V3
								6142.5	0 t/ha 60% V3
								6041.88	0 t/ha 50% V3
								5718.12	0 t/ha 50% V3
								5359.38	0 t/ha 50% V3
								11405.6	5 t/ha 100% V3
								11620	5 t/ha 100% V3
								11873.7	5 t/ha 100% V3
								10307.5	5 t/ha 80% V3
								9931.25	5 t/ha 80% V3
								9782.5	5 t/ha 80% V3
								9555	5 t/ha 70% V3
								8916.25	5 t/ha 70% V3
								9292.5	5 t/ha 70% V3
								8347.5	5 t/ha 60% V3
								8015	5 t/ha 60% V3
								7901.25	5 t/ha 60% V3
								6164.38	5 t/ha 50% V3
								6495.12	5 t/ha 50% V3
								6216.88	5 t/ha 50% V3
								12088.1	10 t/ha 100% V3
								11904.4	10 t/ha 100% V3
								12163.4	10 t/ha 100% V3
								11331.2	10 t/ha 80% V3
								11051.2	10 t/ha 80% V3
								10885	10 t/ha 80% V3
								10255	10 t/ha 70% V3
								9721.25	10 t/ha 70% V3
								10080	10 t/ha 70% V3
								8684.38	10 t/ha 60% V3
								7966.87	10 t/ha 60% V3
								8413.12	10 t/ha 60% V3
								7835.62	10 t/ha 50% V3
								7170.63	10 t/ha 50% V3
								7503.13	10 t/ha 50% V3

## Sheet: Plant Height 
Treatment	Plant height	Plant height+2	plant height+3
2088,100% Etc, 0 tones/ha	97.443	254.723	300.963
2088,100% Etc, 0 tones/ha	96.489	252.516	302.105
2088,100% Etc, 0 tones/ha	95.264	253.292	299.669
2088,70% Etc, 0 tones/ha	74.137	240.793	284.593
2088,70% Etc, 0 tones/ha	79.322	238.139	283.102
2088,70% Etc, 0 tones/ha	75.791	239.907	281.683
2088,50% Etc, 0 tones/ha	54.754	213.658	249.522
2088,50% Etc, 0 tones/ha	53.778	215.342	248.422
2088,50% Etc, 0 tones/ha	56.299	219.235	247.431
2088,100% Etc, 5 tones/ha	125.26	275.982	309.999
2088,100% Etc, 5 tones/ha	124.559	276.363	307.011
2088,100% Etc, 5 tones/ha	126.588	279.89	306.83
2088,70% Etc, 5 tones/ha	110.865	265.864	287.83
2088,70% Etc, 5 tones/ha	109.708	267.499	286.546
2088,70% Etc, 5 tones/ha	108.009	262.145	285.34
2088,50% Etc, 5 tones/ha	94.154	233.095	255.904
2088,50% Etc, 5 tones/ha	91.663	234.126	256.865
2088,50% Etc, 5 tones/ha	93.844	235.653	259.802
2088,100% Etc, 10 tones/ha	186.863	299.666	341.275
2088,100% Etc, 10 tones/ha	187.056	295.717	340.247
2088,100% Etc, 10 tones/ha	185.015	296.241	339.374
2088,70% Etc, 10 tones/ha	113.891	289.084	327.241
2088,70% Etc, 10 tones/ha	110.856	280.949	328.978
2088,70% Etc, 10 tones/ha	112.592	279.139	325.106
2088,50% Etc, 10 tones/ha	96.227	246.344	275.971
2088,50% Etc, 10 tones/ha	97.727	241.676	276.871
2088,50% Etc, 10 tones/ha	99.668	245.676	272.781
YH5427,100% Etc, 0 tones/ha	117.667	230.374	319.247
YH5427,100% Etc, 0 tones/ha	116.893	228.859	318.522
YH5427,100% Etc, 0 tones/ha	115.287	225.785	317.522
YH5427,70% Etc, 0 tones/ha	104.112	223.52	283.797
YH5427,70% Etc, 0 tones/ha	102.836	225.63	285.271
YH5427,70% Etc, 0 tones/ha	100.037	223.259	286.271
YH5427,50% Etc, 0 tones/ha	93.203	214.683	249.034
YH5427,50% Etc, 0 tones/ha	92.227	213.797	250.034
YH5427,50% Etc, 0 tones/ha	91.668	215.576	248.576
YH5427,100% Etc, 5 tones/ha	128.023	245.925	325.145
YH5427,100% Etc, 5 tones/ha	127.716	243.675	327.126
YH5427,100% Etc, 5 tones/ha	124.036	241.345	328.982
YH5427,80% Etc, 5 tones/ha	121.032	238.426	291.499
YH5427,80% Etc, 5 tones/ha	120.581	238.325	292.145
YH5427,80% Etc, 5 tones/ha	119.361	239.622	296.576
YH5427,50% Etc, 5 tones/ha	118.465	229.78	267.499
YH5427,50% Etc, 5 tones/ha	115.269	225.353	262.145
YH5427,50% Etc, 5 tones/ha	116.465	226.159	266.576
YH5427,100% Etc, 10 tones/ha	142.308	289.264	335.095
YH5427,100% Etc, 10 tones/ha	140.172	288.918	336.126
YH5427,100% Etc, 10 tones/ha	141.803	287.423	339.653
YH5427,70% Etc, 10 tones/ha	136.512	284.98	301.653
YH5427,70% Etc, 10 tones/ha	135.264	281.906	303.779
YH5427,70% Etc, 10 tones/ha	139.666	280.386	304.314
YH5427,50% Etc, 10 tones/ha	128.566	252.781	277.891
YH5427,50% Etc, 10 tones/ha	122.512	257.751	276.541
YH5427,50% Etc, 10 tones/ha	126.492	256.541	274.341
6317,100% Etc, 0 tones/ha	120.596	257.528	327.102
6317,100% Etc, 0 tones/ha	119.172	259.113	328.102
6317,100% Etc, 0 tones/ha	118.173	258.275	326.109
6317,70% Etc, 0 tones/ha	117.264	233.241	319.221
6317,70% Etc, 0 tones/ha	114.666	231.978	317.561
6317,70% Etc, 0 tones/ha	110.834	230.087	315.872
6317,50% Etc, 0 tones/ha	59.212	214.683	274.561
6317,50% Etc, 0 tones/ha	56.312	216.797	271.471
6317,50% Etc, 0 tones/ha	55.213	215.576	270.241
6317,100% Etc, 5 tones/ha	142.354	286.657	344.149
6317,100% Etc, 5 tones/ha	141.043	288.045	341.322
6317,100% Etc, 5 tones/ha	145.051	289.235	342.376
6317,70% Etc, 5 tones/ha	126.747	254.653	331.247
6317,70% Etc, 5 tones/ha	125.839	251.661	332.969
6317,70% Etc, 5 tones/ha	129.805	255.341	333.169
6317,50% Etc, 5 tones/ha	62.321	235.314	286.991
6317,50% Etc, 5 tones/ha	60.119	237.779	284.891
6317,50% Etc, 5 tones/ha	59.371	235.722	281.881
6317,100% Etc, 10 tones/ha	150.354	309.162	351.847
6317,100% Etc, 10 tones/ha	151.043	306.841	353.722
6317,100% Etc, 10 tones/ha	152.051	303.102	352.776
6317,70% Etc, 10 tones/ha	147.747	295.641	344.734
6317,70% Etc, 10 tones/ha	145.839	294.108	345.632
6317,70% Etc, 10 tones/ha	142.805	293.105	344.931
6317,50% Etc, 10 tones/ha	69.212	247.891	292.241
6317,50% Etc, 10 tones/ha	68.112	246.871	291.941
6317,50% Etc, 10 tones/ha	70.341	248.751	289.741

## Sheet: Leaf area
Parameters	Vegetative stage	Tasseling stgae	Maturity stage
V1, ETC 100%, 0 tons biochar	230.256	367.868	878.741
V1, ETC 100%, 0 tons biochar	231.197	368.744	879.065
V1, ETC 100%, 0 tons biochar	232.597	365.432	875.988
V1, ETC 70%, 0 tons biochar	224.096	358.385	853.765
V1, ETC 70%, 0 tons biochar	225.096	351.878	854.382
V1, ETC 70%, 0 tons biochar	223.567	350.281	852.311
V1, ETC 50%, 0 tons biochar	217.407	343.705	802.385
V1, ETC 50%, 0 tons biochar	216.207	347.868	804.878
V1, ETC 50%, 0 tons biochar	215.307	349.325	801.257
V1, ETC 100%, 5 tons biochar	266.401	409.325	885.311
V1, ETC 100%, 5 tons biochar	264.639	407.868	884.257
V1, ETC 100%, 5 tons biochar	265.694	406.021	883.157
V1, ETC 70%, 5 tons biochar	248.181	402.744	861.145
V1, ETC 70%, 5 tons biochar	246.639	401.432	860.111
V1, ETC 70%, 5 tons biochar	244.196	400.705	859.311
V1, ETC 50%, 5 tons biochar	221.296	372.671	825.765
V1, ETC 50%, 5 tons biochar	223.396	371.581	824.878
V1, ETC 50%, 5 tons biochar	224.481	269.234	823.771
V1, ETC 100%, 10 tons biochar	276.581	429.072	899.601
V1, ETC 100%, 10 tons biochar	278.401	430.014	896.501
V1, ETC 100%, 10 tons biochar	279.639	428.125	897.964
V1, ETC 70%, 10 tons biochar	271.694	422.688	879.964
V1, ETC 70%, 10 tons biochar	272.181	423.771	876.907
V1, ETC 50%, 10 tons biochar	341.871	384.211	830.721
V1, ETC 50%, 10 tons biochar	342.971	381.414	832.936
V1, ETC 50%, 10 tons biochar	343.976	380.514	831.789
V2, ETC 100%, 0 tons biochar	273.196	393.507	820.101
V2, ETC 100%, 0 tons biochar	270.611	395.993	819.501
V2, ETC 100%, 0 tons biochar	271.836	392.892	818.188
V2, ETC 70%, 0 tons biochar	264.265	376.436	801.432
V2, ETC 70%, 0 tons biochar	262.263	374.892	802.332
V2, ETC 70%, 0 tons biochar	261.251	373.108	803.213
V2, ETC 50%, 0 tons biochar	255.978	362.018	779.211
V2, ETC 50%, 0 tons biochar	254.447	361.016	767.121
V2, ETC 50%, 0 tons biochar	253.597	360.019	766.368
V2, ETC 100%, 5 tons biochar	296.557	462.306	875.884
V2, ETC 100%, 5 tons biochar	295.119	463.213	874.669
V2, ETC 100%, 5 tons biochar	299.128	461.507	873.322
V2, ETC 70%, 5 tons biochar	289.071	451.993	829.603
V2, ETC 70%, 5 tons biochar	286.788	452.285	826.973
V2, ETC 70%, 5 tons biochar	285.065	453.306	824.243
V2, ETC 50%, 5 tons biochar	277.017	374.781	784.214
V2, ETC 50%, 5 tons biochar	278.441	375.621	786.314
V2, ETC 50%, 5 tons biochar	274.305	371.231	782.213
V2, ETC 100%, 10 tons biochar	319.447	550.357	923.396
V2, ETC 100%, 10 tons biochar	317.646	552.388	920.058
V2, ETC 100%, 10 tons biochar	318.546	554.598	921.042
V2, ETC 70%, 10 tons biochar	311.646	539.903	894.542
V2, ETC 70%, 10 tons biochar	310.258	537.106	893.517
V2, ETC 70%, 10 tons biochar	312.059	538.845	891.262
V2, ETC 50%, 10 tons biochar	282.731	394.961	795.321
V2, ETC 50%, 10 tons biochar	287.761	396.942	796.541
V2, ETC 50%, 10 tons biochar	286.831	395.921	799.36
V3, ETC 100%, 0 tons biochar	299.777	398.231	846.696
V3, ETC 100%, 0 tons biochar	294.496	397.853	845.547
V3, ETC 100%, 0 tons biochar	296.735	395.409	841.262
V3, ETC 70%, 0 tons biochar	273.735	387.853	820.409
V3, ETC 70%, 0 tons biochar	272.978	388.409	819.619
V3, ETC 70%, 0 tons biochar	271.447	386.262	818.853
V3, ETC 50%, 0 tons biochar	261.447	345.668	809.153
V3, ETC 50%, 0 tons biochar	257.597	344.793	810.818
V3, ETC 50%, 0 tons biochar	256.557	343.148	811.278
V3, ETC 100%, 5 tons biochar	345.128	490.545	909.959
V3, ETC 100%, 5 tons biochar	348.171	489.913	907.754
V3, ETC 100%, 5 tons biochar	346.788	488.143	908.423
V3, ETC 70%, 5 tons biochar	338.065	459.913	891.346
V3, ETC 70%, 5 tons biochar	337.017	458.143	890.213
V3, ETC 70%, 5 tons biochar	335.441	451.696	896.179
V3, ETC 50%, 5 tons biochar	329.305	384.781	823.935
V3, ETC 50%, 5 tons biochar	328.447	389.893	831.021
V3, ETC 50%, 5 tons biochar	325.646	386.731	829.121
V3, ETC 100%, 10 tons biochar	360.546	569.079	935.032
V3, ETC 100%, 10 tons biochar	362.646	567.032	934.736
V3, ETC 100%, 10 tons biochar	363.258	568.669	932.036
V3, ETC 70%, 10 tons biochar	354.129	509.541	924.868
V3, ETC 70%, 10 tons biochar	352.148	504.341	923.111
V3, ETC 70%, 10 tons biochar	344.147	501.231	920.201
V3, ETC 50%, 10 tons biochar	335.012	399.943	844.532
V3, ETC 50%, 10 tons biochar	331.011	400.021	841.321
V3, ETC 50%, 10 tons biochar	334.012	397.876	840.987

## Sheet: Physiological parameters.
Treatment	Lipids	protein	CAT	sugar	Proline	Peroxidase
2088,100% Etc, 0 tones/ha	1.1414	0.213625	3.10825	0.168	0.219	3.18783
2088,100% Etc, 0 tones/ha	0.979072	0.217375	3.05923	0.165	0.217	3.59747
2088,100% Etc, 0 tones/ha	1.10864	0.227375	2.92908	0.169	0.216	3.88345
2088,70% Etc, 0 tones/ha	1.55778	0.159875	4.1595	0.15	0.225	3.56749
2088,70% Etc, 0 tones/ha	1.50173	0.154875	3.65456	0.158	0.224	3.6481
2088,70% Etc, 0 tones/ha	1.53157	0.163625	3.46524	0.155	0.227	3.91749
2088,50% Etc, 0 tones/ha	1.93904	0.113625	4.77558	0.133	0.257	4.34763
2088,50% Etc, 0 tones/ha	1.9596	0.076125	5.62233	0.136	0.259	4.47947
2088,50% Etc, 0 tones/ha	2.09063	0.064875	6.42775	0.139	0.26	4.99422
2088,100% Etc, 5 tones/ha	0.880437	0.263625	2.48838	0.197	0.244	2.25699
2088,100% Etc, 5 tones/ha	0.750682	0.212375	2.41212	0.195	0.245	2.18816
2088,100% Etc, 5 tones/ha	0.70505	0.204875	2.80149	0.198	0.267	2.40128
2088,70% Etc, 5 tones/ha	0.79727	0.244875	2.68709	0.19	0.268	1.59673
2088,70% Etc, 5 tones/ha	0.751046	0.244875	2.74726	0.191	0.269	2.88484
2088,70% Etc, 5 tones/ha	0.68626	0.239875	2.91874	0.192	0.266	3.01161
2088,50% Etc, 5 tones/ha	0.874249	0.287375	2.92084	0.185	0.276	3.27447
2088,50% Etc, 5 tones/ha	0.745951	0.183625	3.06603	0.186	0.278	3.49626
2088,50% Etc, 5 tones/ha	0.794304	0.198625	3.29264	0.188	0.279	2.94021
2088,100% Etc, 10 tones/ha	0.368517	0.518625	0.790552	0.229	0.254	1.08363
2088,100% Etc, 10 tones/ha	0.371429	0.496125	0.82842	0.23	0.256	1.31418
2088,100% Etc, 10 tones/ha	0.341583	0.536125	0.768478	0.231	0.255	1.218
2088,70% Etc, 10 tones/ha	0.518471	0.359875	1.21153	0.22	0.264	2.00347
2088,70% Etc, 10 tones/ha	0.482229	0.411125	1.06294	0.222	0.261	1.79507
2088,70% Etc, 10 tones/ha	0.523367	0.338625	1.29347	0.225	0.26	2.29162
2088,50% Etc, 10 tones/ha	0.709554	0.289875	2.77857	0.212	0.282	4.60168
2088,50% Etc, 10 tones/ha	0.770701	0.193625	2.52855	0.213	0.285	3.72925
2088,50% Etc, 10 tones/ha	0.758144	0.212375	2.44738	0.216	0.284	3.63887
YH5427,100% Etc, 0 tones/ha	1.11338	0.238625	3.113	0.142	0.166	3.3803
YH5427,100% Etc, 0 tones/ha	1.16879	0.274875	2.37926	0.142	0.164	3.43383
YH5427,100% Etc, 0 tones/ha	1.16278	0.286125	2.40864	0.144	0.171	3.14514
YH5427,70% Etc, 0 tones/ha	1.14468	0.226125	3.71228	0.138	0.181	3.7166
YH5427,70% Etc, 0 tones/ha	0.965241	0.231125	3.74412	0.14	0.182	4.27775
YH5427,70% Etc, 0 tones/ha	1.10391	0.228625	3.87634	0.142	0.18	4.48342
YH5427,50% Etc, 0 tones/ha	2.09045	0.241125	4.06843	0.131	0.262	3.90254
YH5427,50% Etc, 0 tones/ha	2.06679	0.231125	4.29638	0.134	0.259	4.28772
YH5427,50% Etc, 0 tones/ha	2.04859	0.201125	4.48163	0.136	0.263	4.51781
YH5427,100% Etc, 5 tones/ha	0.498007	0.516125	1.24051	0.198	0.225	2.0005
YH5427,100% Etc, 5 tones/ha	0.460965	0.513625	1.41119	0.199	0.221	1.94728
YH5427,100% Etc, 5 tones/ha	0.549591	0.518625	1.00963	0.2	0.227	1.95011
YH5427,80% Etc, 5 tones/ha	1.12903	0.441125	2.41683	0.194	0.253	2.90196
YH5427,80% Etc, 5 tones/ha	0.536306	0.493625	2.56592	0.193	0.256	2.01887
YH5427,80% Etc, 5 tones/ha	0.500273	0.476125	2.73694	0.19	0.257	2.95537
YH5427,50% Etc, 5 tones/ha	1.40291	0.338625	2.89701	0.185	0.269	1.82798
YH5427,50% Etc, 5 tones/ha	1.38289	0.346125	3.03871	0.182	0.264	2.49598
YH5427,50% Etc, 5 tones/ha	1.34795	0.306125	3.09371	0.184	0.263	2.58442
YH5427,100% Etc, 10 tones/ha	0.355414	0.667375	0.415656	0.225	0.235	1.27443
YH5427,100% Etc, 10 tones/ha	0.380892	0.546125	0.428191	0.226	0.232	1.30007
YH5427,100% Etc, 10 tones/ha	0.26606	0.516125	0.450233	0.228	0.236	1.43328
YH5427,70% Etc, 10 tones/ha	0.388535	0.508625	0.543711	0.219	0.27	1.65525
YH5427,70% Etc, 10 tones/ha	0.391629	0.462375	0.544596	0.22	0.263	1.69158
YH5427,70% Etc, 10 tones/ha	0.451865	0.484875	0.568343	0.221	0.26	1.74822
YH5427,50% Etc, 10 tones/ha	1.16178	0.383625	1.63962	0.213	0.316	2.41903
YH5427,50% Etc, 10 tones/ha	1.13722	0.366125	2.42813	0.214	0.314	2.69887
YH5427,50% Etc, 10 tones/ha	1.30282	0.376125	2.10834	0.215	0.311	2.69359
6317,100% Etc, 0 tones/ha	1.30282	0.269875	3.26454	0.189	0.148	3.39707
6317,100% Etc, 0 tones/ha	1.21063	0.286125	2.88282	0.185	0.144	3.09356
6317,100% Etc, 0 tones/ha	1.20687	0.323625	3.04762	0.182	0.145	3.68764
6317,70% Etc, 0 tones/ha	1.11565	0.243625	3.59979	0.174	0.188	2.8117
6317,70% Etc, 0 tones/ha	1.19327	0.237375	3.72828	0.175	0.192	2.84781
6317,70% Etc, 0 tones/ha	1.13121	0.228625	4.30837	0.178	0.199	2.7906
6317,60% Etc, 0 tones/ha	2.99581	0.222375	4.44744	0.127	0.225	4.02923
6317,60% Etc, 0 tones/ha	2.9454	0.197375	4.65611	0.121	0.228	4.54972
6317,60% Etc, 0 tones/ha	3.0071	0.167375	5.32622	0.12	0.26	4.69113
6317,100% Etc, 5 tones/ha	0.727571	0.512375	1.2647	0.242	0.197	1.41498
6317,100% Etc, 5 tones/ha	0.61747	0.561125	1.34892	0.244	0.198	1.5443
6317,100% Etc, 5 tones/ha	0.631847	0.514875	1.3074	0.24	0.199	1.48118
6317,70% Etc, 5 tones/ha	0.850773	0.441125	1.85898	0.235	0.183	1.8469
6317,70% Etc, 5 tones/ha	0.75232	0.463625	1.80511	0.232	0.18	1.93202
6317,70% Etc, 5 tones/ha	0.909427	0.496125	1.89404	0.231	0.184	2.11482
6317,50% Etc, 5 tones/ha	1.59527	0.338625	3.54193	0.213	0.284	3.38323
6317,50% Etc, 5 tones/ha	1.61183	0.356125	3.26272	0.211	0.282	3.04254
6317,50% Etc, 5 tones/ha	1.51174	0.316125	3.57025	0.212	0.28	3.31313
6317,100% Etc, 10 tones/ha	0.294631	0.667375	0.546919	0.285	0.161	1.26615
6317,100% Etc, 10 tones/ha	0.293358	0.698625	0.560537	0.286	0.165	1.21111
6317,100% Etc, 10 tones/ha	0.345041	0.614875	0.548975	0.288	0.168	1.26189
6317,70% Etc, 10 tones/ha	0.33576	0.456125	0.798105	0.279	0.176	1.56041
6317,70% Etc, 10 tones/ha	0.292266	0.499875	0.848316	0.278	0.179	1.46271
6317,70% Etc, 10 tones/ha	0.371065	0.419875	0.892059	0.279	0.175	1.48842
6317,50% Etc, 10 tones/ha	0.993631	0.373625	2.41458	0.227	0.208	2.40633
6317,50% Etc, 10 tones/ha	0.992903	0.344875	2.74463	0.225	0.207	2.66855
6317,50% Etc, 10 tones/ha	1.02056	0.316125	2.31572	0.221	0.206	2.36358
